# Supplementary material
Source: Research Square preprint supplement (doi:10.21203/rs.3.rs-9131253/v1)
Supplement: Supplementary file 1 [file fa2067a942decc00cb50b5ba.docx]

**Additional file 1. Framework Method: Analytical Development**

The Framework Method was used to structure the thematic analysis across four focus groups (two with adult and two with young people). This approach was selected for its transparency and systematic organisation of qualitative data, allowing comparison both within and across participant groups. The analytic process combined deductive and inductive strategies: deductive coding provided an initial structure informed by the research questions and relevant literature, while inductive coding allowed new, data-driven insights to emerge from participants’ accounts. All transcripts were imported into NVivo 15 to support data management, coding, and framework charting.

The analysis proceeded through iterative stages—beginning with familiarisation and initial coding, followed by framework development, application, and interpretation—ensuring that findings remained both theoretically informed and grounded in participants’ lived experiences.

Step 1. Developing the Initial (Deductive) Framework

The initial framework was informed by:

- Research questions and topic guide
- Empirical and theoretical literature on gambling harm and prevention
- Public health models of risk communication

| **Preliminary Category** | **Rationale / Source** | **Example Focus** |
| --- | --- | --- |
| Perceived harms | Derived from literature on gambling impacts | Financial, relational, and mental health harms |
| Message credibility | Guided by communication theory and prior studies | Trust, realism, and authenticity of messaging |
| Structural determinants | Informed by public health frameworks | Industry influence and policy regulation |

Step 2. Identifying Initial Codes and Integrating Inductive Insights

Open coding was undertaken systematically across all four focus group transcripts. Each data segment was coded to one or more categories from the **i**nitial deductive framework, with new inductive codes added whenever participants’ language or ideas did not fit the predefined categories.

Codes were labelled *deductive* when they directly reflected concepts derived from the study’s research questions, topic guide, or prior literature (e.g., *perceived harms*, *message credibility*). Codes were labelled *inductive* when they captured new or unanticipated concepts emerging from the data itself (e.g., *moral framings of harm*, *peer-led prevention*).

Team members discussed and compared coding throughout this stage to ensure shared understanding of how each code type was applied. This iterative process allowed inductive insights to expand, refine, or reshape the original framework rather than sit separately from it.

Examples of inductive codes emerging during this stage included:

- Moral framings of harm, where participants described gambling as “betrayal” or “moral corruption”.
- Hidden and intergenerational harms, referring to effects on children and family relationships.
- Digital and cultural normalisation, through gaming, social media, and celebrity influence.
- Peer-led and lived-experience prevention, particularly among youth participants.

Step 3. Final Analytical Framework

The final framework consisted of three overarching themes encompassing both deductive foundations and inductively derived subthemes:

| Theme | Shared Subthemes | Group-specific Subthemes |
| --- | --- | --- |
| 1. Gambling-related harms are multifaceted and often hidden | Emotional and mental health harms; Stigma and secrecy; Financial and relational consequences | Delayed recognition (adults); Erosion of trust (young people) |
| 2. Predatory tactics of the gambling industry | Aggressive marketing; Normalisation through sports and media; Perceived government inaction | Celebrity and influencer promotion (youth) |
| 3. Harm prevention requires multi-level, targeted strategies | Desire for credible, independent messages; Lived-experience storytelling | Peer-led, platform-relevant education (youth); Recognition and support for affected others (adults) |

Step 4. Iterative Refinement and Integration

Regular team meetings compared emergent codes against the evolving framework to ensure conceptual fit and to review how inductive codes had reshaped the deductive structure. For instance, the original deductive category “Structural determinants” was broadened to “the predatory tactics of the gambling industry” to reflect participants’ emphasis on marketing saturation and manipulation.

This iterative process ensured that deductive categories provided an organising structure, while inductive insights preserved the authenticity and depth of participants’ lived experiences.
